1           **Adverse birth outcomes and associated factors among**  
2           **newborns delivered in a western African country: a**  
3                           **case–control study**

4  
5   Alexandra Vasconcelos (A Vasconcelos)<sup>1\*</sup>, Swasilanne Sousa (S Sousa)<sup>2</sup>, Nelson Bandeira (N  
6   Bandeira)<sup>2</sup>, Marta Alves (M Alves)<sup>3</sup>, Ana Luísa Papoila (AL Papoila)<sup>3</sup>, Filomena Pereira (F Pereira)<sup>1</sup>,  
7   Maria Céu Machado (MC Machado)<sup>4</sup>

8  
9   \* Correspondence: [alexandravasc@gmail.com](mailto:alexandravasc@gmail.com)

10   [ORCID: 0000-0001-8042-0846](#)

11  
12   **Author affiliations**

13  
14   1. Unidade de Clínica Tropical - Global Health and Tropical Medicine (GHTM), Instituto de Higiene e  
15   Medicina Tropical (IHMT), Universidade NOVA de Lisboa. Lisboa - Portugal

16   2. Hospital Dr. Ayres de Menezes, São Tomé, República Democrática de São Tomé e Príncipe

17   3. CEAUL, NOVA Medical School/Faculdade de Ciências Médicas, Universidade NOVA de Lisboa, Lisboa  
18   - Portugal

19   4. Faculdade de Medicina de Lisboa, Universidade de Lisboa. Lisboa - Portugal

20  
21   NOTE: This preprint reports new research that has not been certified by peer review and should not be used to guide clinical practice.

## 22 Abstract

---

### 23 Background

24 Newborns with one or more adverse birth outcomes (ABOs) are at greater risk of mortality or long-  
25 term morbidity with health impacts into adulthood. Hence, identifying ABO-associated factors is  
26 crucial for devising comprehensive and relevant interventions. The aim of this study was to identify  
27 factors that are associated with the occurrence of ABO – prematurity (PTB), low birth weight (LBW),  
28 macrosomia, congenital anomalies, asphyxia, and sepsis - among babies delivered at the only hospital  
29 of Sao Tome & Principe (STP), a resource-constrained sub-Saharan Western African country.

30

### 31 Methods

32 Hospital-based unmatched case–control study conducted in STP among newborns from randomly  
33 selected mothers from July 2016 to November 2018. Newborns with one or more ABO (gestational  
34 age <37 weeks, LBW < 2.5 kg, BW >4 kg, 5-minute Apgar score <7, major congenital anomalies, and  
35 probable sepsis based on clinical criteria) were the cases (ABO group), while healthy newborns without  
36 ABO were the controls (no-ABO group). Data were collected by a face-to-face interview and abstracted  
37 from antenatal pregnancy cards and medical records. Multivariable logistic regression analysis was  
38 performed to identify ABO risk factors considering a level of significance  $\alpha=0.05$ .

39

### 40 Results

41 A total of 519 newborns (176 with ABO and 343 with no-ABO) were enrolled. The mean gestational  
42 age and birth weight of cases and controls were 36 (SD=3.7) weeks with 2659 (SD=881.44) g and 39.6  
43 (SD=1.0) weeks with 3256 (SD=345.83) g, respectively. In a multivariable analysis, twin pregnancy [aOR  
44 4.92, 95% CI 2.25–10.74], prolonged rupture of membranes [aOR 3.43, 95% CI 1.69–6.95], meconium-

45 stained amniotic fluid [aOR 1.59, 95% CI 0.97-2.62], and fewer than eight antenatal care (ANC) visits  
46 [aOR 0.33, 95% CI 0.18–0.60] were significantly associated with adverse birth outcomes.

47

48 Conclusion

49 Modifiable factors were associated with ABOs in this study and should be considered in cost-  
50 effectiveness interventions. The provision of high-quality ANC with eight or more visits should be a  
51 priority at ANC service delivery in STP. Twin pregnancies as well as intrapartum factors such as  
52 prolonged rupture of membranes and meconium-stained amniotic fluid are red flags for adverse birth  
53 outcomes that should receive prompt intervention and follow-up.

54

55 Keywords: adverse birth outcome, low birth weight, preterm birth, birth asphyxia, neonatal sepsis

## 56 Introduction

---

57 Adverse birth outcomes (ABOs) are major global public health problems linked to child mortality and  
58 morbidity since they can impact children's short- and long-term well-being due to neurological and  
59 health problems throughout their life course [1,2]. Inevitably, a newborn with an ABO is at a higher  
60 risk for mortality than newborns without an ABO [3]. Additionally, ABO may disrupt the family  
61 condition, leading to high individual and social costs [4].

62 The magnitude of ABOs worldwide has dramatically decreased in recent decades, although a large gap  
63 still exists between high-income countries and low- and middle-income countries (LMICs), making  
64 birth outcomes important measures of health at birth in LMICs [4]. The specific burden of each ABO  
65 can vary according to country specificities, although preterm birth is the most well-accepted  
66 benchmark for morbidity attributable to early gestation [5]. In recent years, ABOs in LMICs have  
67 received attention with a wide range of ABOs being reported across different studies [6-11]. While  
68 some studies include indicators for early gestation, such as preterm birth (PTB), fetal growth  
69 restriction, low birth weight (LBW) as well as perinatal mortality and fetal loss/miscarriage [4,5], others  
70 exclusively analyze the ABO for live newborns at birth [12]. On the other hand, ABO can coexist and  
71 share the same underlying risk factors. Etiologies of ABO are complex, multifactorial, physiologically  
72 diverse, and not entirely well understood, despite decades of research [5].

73 Different studies have revealed that diverse risk factors are associated with ABOs [8]. Studies in LMICs  
74 have reported numerous sociodemographic factors, maternal factors, previous pregnancy outcomes,  
75 neonatal factors, and socioeconomic and health system-related factors [12, 13]. For instance, mothers  
76 with previous pregnancy outcomes of PTB or LBW are more likely to have recurrence of these ABO  
77 than those without previous PTB or LBW [6,9]. A study on maternal health during pregnancy found  
78 that women who had at least one health problem during their pregnancy had a twofold- higher risk of  
79 delivering LBW newborns in comparison to women without any health problems (aOR 2.6, CI: 1.4–4.8)  
80 [14]. Antepartum problems such as malaria and other infections, anemia, hypertension,

81 hyperglycemia, and obstetric complications are all linked to ABO [9-12]. Lack of adequate ANC,  
82 household air pollution from unclean cooking fuels, open defecation, no access to improved water,  
83 violence, and other socioeconomic disparities are also considered important risk factors for ABO in  
84 sub-Saharan African (SSA) countries [15-17].

85 Most risk factors contributing to ABO are amenable to modification, although they are not the same  
86 across different cultures and socioeconomic statuses within a society [4,18]. Thus, knowing each  
87 context-specific reality enables targeting and implementing the most proper evidence-based  
88 interventions [3,4].

89 Sao Tome & Principe (STP) is an LMIC and an SSA country, with limited data on the overall adverse  
90 birth outcome at the country level, and in the current era of Sustainable Development Goals (SDG),  
91 neonatal mortality remains high, demanding urgent intervention in ABO reduction [19-21]. For this  
92 study, ABOs were defined as PTB, LBW, macrosomia, congenital anomaly, birth asphyxia and neonatal  
93 sepsis suspicion. This present study is included in a broader project on neonatal health and adverse  
94 outcomes [22-24], and the authors studied the determinants for perinatal and neonatal mortality  
95 (until the 28<sup>th</sup> day of life) in STP in another study. This current study aimed to identify the risk factors  
96 for adverse birth outcomes among newborns delivered at the only hospital maternity unit in STP.

97 Knowledge of the burden of adverse birth outcomes and key risk factors will provide policy makers  
98 and healthcare practitioners in Sao Tome & Principe with evidence that can be used to inform  
99 strategies to achieve reductions in ABO and improve overall perinatal health. Additionally, the findings  
100 of this study will help to design targeted interventions and better allocate resources.

101

102

103

## 104 Materials and methods

---

105

### 106 Study design

107 A facility-based unmatched case–control study was conducted in STP among 519 newborns (176 cases  
108 and 343 controls) whose mothers gave birth at Hospital Dr. Ayres de Menezes (HAM) maternity ward.

109

### 110 Setting

111 The archipelago of Sao Tome & Principe is a 219 161 inhabitant country, one of the smallest Western  
112 SSA countries, with a young population and an annual birth cohort of approximately 6.521 [19]. The  
113 rate of deliveries in health units is approximately 98%, with 82.4% occurring at the HAM maternity  
114 ward, the only hospital in the country [20,21]. The HAM is a tertiary healthcare facility and receives  
115 complicated cases referred from facilities with lower levels of care, as it is the only facility with  
116 Comprehensive Emergency Obstetric and Neonatal Care (EmONC) capable of providing blood  
117 transfusions and performing cesarean sections.

118 The maternity unit has a facility-based clinical care unit for ill newborn babies - Newborn Care Unit  
119 (NCU) - with six baby cots, which usually receives babies with low Apgar score, prematurity, birth  
120 weight <1800 or birth weight >4000 g, congenital malformation, suspected infection, or risk of  
121 infection, as well as for observation in case of poor maternal outcome.

122 It is a resource-constrained NCU, like most units in LMICs, lacking a mechanical ventilator or any  
123 continuous positive airway pressure machine, surfactant therapy and enteric feeding for assisting sick  
124 babies [25]. The babies receive oxygen through nasal prongs or face masks. In the country, there are  
125 only two pediatricians and no neonatologists.

126

127

128

129

130 Participants

131 The recruitment of newborns' mothers occurred from July 2016 to November 2018.

132 The eligibility criteria for participants were as follows: 1) all neonates delivered alive at HAM and 2)  
133 newborns who were born outside the hospital but were later admitted at HAM on the day of birth. A  
134 total of 535 newborns were initially enrolled.

135 The exclusion criteria included the following: 1) all neonates delivered at HAM born without any signs  
136 of life (stillbirths), 2) newborns whose mothers had cognitive impairment, and 3) adolescent or  
137 illiterate mothers who had not obtained permission from their parents or legal guardians to  
138 participate in the study. Sixteen met the exclusion criteria (stillbirths), with a total of 519 participants  
139 enrolled.

140

141 Selection of cases and controls

142 Cases (ABO group) were newborns with at least one adverse birth outcome: 1) preterm as defined as  
143 a birth that occurred before 37 completed weeks (less than 259 days) of gestation [26]; 2) low birth  
144 weight (LBW) as a weight of < 2.5 kg at birth [27,28]; 3) macrosomia as a birth-weight over 4000 g  
145 irrespective of gestational age [29]; 4) birth asphyxia as an APGAR score at 5- minutes inferior to seven  
146 [30,31].; 5) major congenital anomaly as structural changes in one or more parts of the infant's body  
147 that are present at birth; and/or 6) probable sepsis defined as having an intrapartum infectious risk  
148 with neonatal clinical suspicion of early onset sepsis plus admission to NCU for antibiotic treatment.

149 Controls (no-ABO group) were healthy newborns without adverse birth outcomes ( $\geq$  37 gestational  
150 weeks at birth, weight  $\geq$  2.5 kg at birth and not greater than 4 kg, 5-min APGAR score  $\geq$  7, no congenital  
151 anomaly, and no probable sepsis).

152

153 Sampling method

154 Sample size followed the WHO-steps approach [32] applying a web-based sample size calculator,  
155 Raosoft (<http://www.raosoft.com/samplesize.html>) which suggested a minimum sample size of

156 S = 355, which placed the right dimension between 355 (95%) and 579 (99%) confidence. A total of  
157 535 participants were enrolled based on the following assumptions: two-sided 95% confidence level,  
158 power of 80% to detect an odds ratio of at least 2 for adverse birth outcomes. This sample size was  
159 also supported by PASS software (<https://www.ncss.com/software/pass/>).

160 Eligible cases were selected through random sampling applied to recruit the newborn's mother. Each  
161 morning, from the pile of mothers' medical folders, every second interval folder was selected and then  
162 carried on asking for consent for enrollment. The study was performed in different months (two weeks  
163 every two other months) to avoid seasonal interference (rain season and malaria period), avoiding  
164 effects by means of confounding variables by guaranteeing a sample with few biases. Women were  
165 invited to participate in the study after admission but were interviewed only after delivery. Invitations  
166 were made by the main investigator and occurred during daytime hours, from Monday to Friday.  
167 Consenting participants in the sample were followed-up (mother and newborn) throughout their stays  
168 until hospital discharge.

169

#### 170 Operational definition

171 "Adverse birth outcome" in this study implies the presence of at least one or more of the neonatal  
172 conditions previously specified in the topic "Selection of cases and controls". Thus, if the mothers  
173 admitted to the labor ward gave birth to a baby with one or more ABOs, then these were considered  
174 newborns with an adverse birth outcome (ABO group). Those who gave normal live birth, without the  
175 abovementioned adverse birth outcome were labeled "newborns with no-ABO" (no-ABO group) [4].  
176 If newborns first admitted as "newborns with no-ABO" were posteriorly admitted at the Neonatal Unit  
177 Care, they were included in the ABO group if one of the abovementioned ABOs were identified.

178 Gestational age was estimated from the date of onset of the last normal menstrual period or through  
179 ultrasound dating of pregnancy.



180 The definition of birth asphyxia was only determined using the components of the APGAR score table  
181 [30,31] since techniques such as umbilical arterial blood gas samples from a clamped section of the  
182 umbilical cord are not available in STP. This was similarly applied to both term and preterm infants  
183 [23].

184 Infection as early-onset neonatal sepsis diagnosed in STP is only possible in a suspicion-based  
185 algorithm since there are no microbiologic techniques such as, blood culture, available. Therefore, for  
186 this study, “probable sepsis” was defined as newborns admitted to NCU due to early suspicious signs  
187 and symptoms (hypothermia or fever, lethargy, poor perfusion, prolonged capillary refill time,  
188 hypotonia, bulging fontanel, respiratory distress, apnea, and gasping respiration), with a maternal  
189 infectious risk and requiring antibiotic intravenous treatment [33,34].

190 The maternal infectious risk was operationally defined as the sum of all the following risk factors: 1)  
191 maternal fever (axillary temperature >37.9 C) at the time of delivery, 2) prolonged rupture of the  
192 membrane (≥18 hours), and/or 3) foul-smelling amniotic fluid [35].

193

#### 194 Study variables

195 The dependent variable was the overall adverse birth outcomes. The independent variables tested in  
196 this study included factors grouped into five categories. The first category included the newborns’  
197 maternal sociodemographic factors, such as age, educational status, occupation, marital status,  
198 education of the baby’s father, residence, and type of access to water and sanitation. The next  
199 category was the preconception main factors, such as women’s pregnancy intention, contraceptive  
200 utilization, and current obstetric condition (gravidity, parity, previous abortion, stillbirth, previous  
201 cesarean section and preceding birth interval). The third category included ANC service, such as  
202 number of visits, gestational age at first ANC visit, obstetric ultrasound, and number of fetuses in the  
203 ultrasound (twin pregnancies). This third category also included antepartum factors, such as the  
204 presence of medical conditions during the current pregnancy, including maternal anemia (hemoglobin

205 concentration <11 g/dl), bacteriuria, hyperglycemia, malaria, HIV, syphilis, and hepatitis B virus. The  
206 fourth category included health facility-related factors (being transferred from another unit and who  
207 assisted the delivery) as well as intrapartum factors, such as mode of delivery and complications (fetal  
208 malpresentation [36], umbilical cord complication [37], prolonged rupture of membranes [33,38],  
209 meconium-stained amniotic fluid [39], postpartum hemorrhage (>500 mL bleeding), preeclampsia  
210 (hypertension  $\geq 140/90$  mmHg and proteinuria in women who were normotensive at ANC), and  
211 obstructed labor [40]). The last or fifth category was the newborn characteristics (gestational age, sex,  
212 birth weight) and complications (intrauterine growth restriction, infectious risk, neonatal  
213 resuscitation, fetal distress at birth, admission to the NCU and intravenous antibiotic treatment).

214 Since most pregnant women performed tetanus toxoid vaccination, iron supplementation and blood  
215 pressure measurements, these factors were not considered. All mothers stated no consanguinity with  
216 the baby's father and did not have smoking habits; therefore, these risk factors were also not included.

217

#### 218 Data collection

219 Data on the characteristics of participants were gathered and collected from antenatal pregnancy  
220 cards, obstetric maternal and newborn records. For antepartum data, relevant details of the perinatal  
221 history and antenatal period were collected systematically from the antenatal pregnancy cards.  
222 Intrapartum data were collected from labor follow-up sheets, delivery summaries and maternal  
223 medical records. Postpartum data were abstract for newborns from birth charts and/or newborn  
224 medical records if admitted to the NCU.

225 Sociodemographic characteristics were supplemented with a structured administered questionnaire  
226 through a face-to-face interview of the mothers 12-24 hours after delivery. This questionnaire was  
227 adapted from the STP Demographic and Health Survey (DHS) and other similar studies [18].

228

229 Data quality control

230 The questionnaires were administered in Portuguese, the national language. The questionnaire was  
231 pretested at HAM one month before data collection in 23 mothers, and modifications were made  
232 based on the pretest results, mainly adjusting terminology for more culturally-friendly terms. Consent  
233 to participate in the study was obtained at the time of admission at HAM, but the interview was held  
234 until after the woman was stabilized and ready to be discharged. Continuous follow-up and  
235 supervision of data collection were made by the supervisors. The collected data were checked daily  
236 for completeness. The principal investigator (a pediatrician) executed and was responsible for the  
237 main field activities as follows: 1) obtaining consent and enrollment of the mothers, 2) data collection  
238 from ANC cards plus maternal clinical and newborn records, 3) newborns' clinical exams (for diagnosis  
239 confirmation), 4) face-to-face interviews, and 5) to perform all data collection entry into the app  
240 survey tool.

241

242 Data management

243 Data were secured in a confidential and private location, and participants were referred to by  
244 identification numbers. The informed consent forms were kept separate from the questionnaires.  
245 Both could only be linked by a coding sheet available only to the principal investigator.

246

247 Data analysis

248 Data were entered into the QuickTapSurvey app (2010-2021 Formstack), an offline survey app tool,  
249 and further analyzed using the Statistical Package for the Social Sciences for Windows, version 25.0  
250 (IBM Corp. Released 2017. IBM SPSS Statistics for Windows, Version 25.0. Armonk, NY: IBM Corp.).  
251 The captured data were then checked for completeness and accuracy by a qualified biostatistician.  
252 Categorical data are presented as frequencies and percentages or means (standard deviations) and  
253 ranges (min-max), as appropriate. In this study, cases were coded as 1, and controls were coded as 0

254 for analysis. The proportion of missing data ranged from 0.8 to 10% across variables. Missing values  
255 higher than 10% were described in the analysis.

256 The chi-square test was used to compare the proportion of cases and controls between selected  
257 categorical variables. To recognize the determinants of ABO, univariable and multivariable logistic  
258 regression analyses were performed. In the univariable analysis, explanatory variables with a p value  
259 <0.25 were candidates for a multivariable logistic regression model to monitor the influence of  
260 confounding variables. With their 95% confidence intervals (95% CI), crude (cOR) and adjusted (aOR)  
261 odds ratios were determined to assess the strength and existence of an association. The level of  
262 significance  $\alpha=0.05$  was considered.

263

#### 264 Ethics approval and consent to participate

265 The Ministry of Health of Sao Tome & Principe and the main board of the Hospital Dr. Ayres de  
266 Menezes are dedicated ethics oversight bodies, and both approved this study. All methods were  
267 performed in accordance with the relevant guidelines and regulations in practice. Written informed  
268 consent was obtained from all participants (or their parent or legal guardian in the case of adolescent  
269 under 16 or for illiterate pregnant women) after the purpose of the research was explained orally by  
270 the principal investigator. Participants' or their legal representatives' also consented to have the  
271 results of this research work published. Participation in the survey was voluntary, as participants could  
272 decline to participate at any time during the study.

## 273 Results

---

274

275 A total of 519 newborns (176 cases and 343 controls) were enrolled. The newborn's mean gestational  
276 age (GA) was 38.73 weeks with a standard deviation (SD) of 2.62 (minimum 25 - maximum 43 weeks).  
277 The mean birth weight was 3053.79  $\pm$ (SD=649) g (minimum 900 g – maximum 4650 g). Cases had a  
278 mean GA and birth weight of 36.02  $\pm$ (SD=3.7) and 2659.66  $\pm$ (SD=881.44) g, respectively, while their  
279 counterparts had 39.61  $\pm$ (SD=1.03) weeks and 3256.02  $\pm$ (SD=345.83) g, respectively. Mean maternal  
280 age was 26.5 years with a standard deviation of 7.03 (minimum 14 - maximum 43 years old). The mean  
281 maternal age for cases and controls was 26.99 (SD=  $\pm$ 7.15) and 26.24 (SD=  $\pm$ 6.96), respectively.

282

283 Prevalence of adverse birth outcomes

284 The current study revealed that 343 (66%) births were healthy live births, while the remaining 176  
285 (34%) were births with child-related adverse birth outcomes. The current study identified 6 types of  
286 abnormal birth outcomes (Table 1). Of these, 92 (17.7%) were born preterm, 83 (16%) had low birth  
287 weight, and 42 (8.1%) had birth asphyxia. The magnitude of the congenital anomalies was 8 (1.5%).  
288 The study also identified a 4% rate of macrosomia and 4% of probable neonatal sepsis.

289

290

291

292

293

294 **Table 1** Frequency and types of adverse birth outcomes related to the newborns among deliveries  
295 attended in HAM, Sao Tome & Principe

296

| Adverse birth outcomes       |                | Frequency | Percent |
|------------------------------|----------------|-----------|---------|
| Preterm baby or birth        | No             | 427       | 82.3    |
|                              | Yes            | 92        | 17.7    |
| Low Birth Weight             | No             | 436       | 84      |
|                              | Yes            | 83        | 16      |
| Macrosomia                   | No             | 498       | 96.0    |
|                              | Yes            | 21        | 4.0     |
| Congenital anomaly           | No             | 511       | 98.5    |
|                              | Yes            | 8         | 1.5     |
| Birth asphyxia               | No             | 477       | 91.9    |
|                              | Yes            | 42        | 8.1     |
| Sepsis suspicion             | No             | 498       | 95.9    |
|                              | Yes            | 21        | 4.0     |
| ABOs observed in a new birth | no ABO         | 343       | 66      |
|                              | at least 1 ABO | 176       | 34      |
|                              | Total          | 519       | 100.0   |

297 Abbreviations: ABOs - adverse birth outcomes.

298

299 The maternal characteristics as well as antepartum, intrapartum, and postpartum factors for the total  
300 of the participants and for cases versus controls are described in Table 2.

301

302

303

304

305 **Table 2** Maternal characteristics as well as antepartum, intrapartum, and postpartum factors for all  
306 participants and for cases (newborns with ABO) versus controls (newborns with no-ABO)

| Variables                       | TOTAL n= 519 | ABO<br>n= 176<br>n (%) | no-ABO<br>n= 343<br>n (%) | p-value |
|---------------------------------|--------------|------------------------|---------------------------|---------|
| <b>Sociodemographic factors</b> |              |                        |                           |         |
| Age                             |              |                        |                           | 0.277   |
| 14-16                           | 29 (5.6)     | 11 (6.3)               | 18 (5.2)                  |         |
| 17-19                           | 74 (14.3)    | 21 (11.9)              | 53 (15.5)                 |         |
| 20-34                           | 330 (63.6)   | 108 (61.4)             | 222 (64.7)                |         |
| ≥35                             | 86 (16.6)    | 36 (20.5)              | 50 (14.6)                 |         |
| Maternal education              |              |                        |                           | 0.004   |
| none                            | 19 (3.7)     | 7 (4)                  | 12 (3.5)                  |         |
| primary                         | 298 (57.4)   | 111 (63.1)             | 187 (54.5)                |         |
| secondary                       | 166 (32)     | 40 (22.7)              | 126 (36.7)                |         |
| higher                          | 36 (6.9)     | 18 (10.2)              | 18 (5.2)                  |         |
| Maternal occupation             |              |                        |                           | 0.921   |
| housewife                       | 326 (62.8)   | 111 (63.1)             | 215 (62.7)                |         |
| student                         | 36 (6.9)     | 11 (6.3)               | 25 (7.3)                  |         |
| employed                        | 157 (30.3)   | 54 (30.7)              | 103 (30)                  |         |
| Marital status                  |              |                        |                           | 0.650   |
| union/married                   | 410 (79)     | 137 (77.8)             | 273 (79.6)                |         |
| single                          | 109 (21)     | 39 (22.2)              | 70 (20.4)                 |         |
| Baby's father education         |              |                        |                           | 0.163   |
| none                            | 11 (2.1)     | 3 (1.7)                | 8 (2.3)                   |         |
| primary                         | 178 (34.3)   | 65 (36.9)              | 113 (32.9)                |         |
| secondary                       | 126 (24.3)   | 39 (22.2)              | 87 (25.4)                 |         |
| higher                          | 38 (7.3)     | 19 (10.8)              | 19 (5.5)                  |         |
| unknown                         | 166 (32)     | 50 (28.4)              | 116 (33.8)                |         |
| Residence                       |              |                        |                           | 1.000   |
| urban                           | 231 (45.3)   | 77 (45.3)              | 154 (45.3)                |         |
| rural                           | 279 (54.7)   | 93 (54.7)              | 186 (54.7)                |         |
| Improved water                  |              |                        |                           | 0.917   |
| yes                             | 377 (72.6)   | 127 (72.7)             | 250 (72.9)                |         |
| no                              | 142 (27.4)   | 49 (27.8)              | 93 (27.1)                 |         |
| Sanitation                      |              |                        |                           | 0.516   |
| yes                             | 272 (52.4)   | 96 (54.5)              | 176 (51.3)                |         |
| open defecation                 | 247 (47.6)   | 80 (45.5)              | 167 (48.7)                |         |

307

|                                     |            |            |            |       |
|-------------------------------------|------------|------------|------------|-------|
| <b>Preconception factors</b>        |            |            |            |       |
| Pregnancy planned                   |            |            |            | 0.631 |
| yes                                 | 126 (24.3) | 41 (23.3)  | 85 (24.8)  |       |
| no                                  | 293 (56.5) | 97 (55.1)  | 196 (57.1) |       |
| missing                             | 100 (19.3) | 38 (21.6)  | 62 (18.1)  |       |
| Ever use of family planning methods |            |            |            | 0.721 |
| yes                                 | 106 (24.6) | 33 (23.2)  | 73 (25.3)  |       |
| no                                  | 325 (75.4) | 109 (76.8) | 216 (74.7) |       |
| Gravidity                           |            |            |            | 0.389 |

|                            |            |            |            |        |
|----------------------------|------------|------------|------------|--------|
| 1                          | 126 (24.3) | 37 (21)    | 89 (25.9)  |        |
| 2-5                        | 273 (52.6) | 94 (53.4)  | 179 (52.2) |        |
| ≥5                         | 120 (23.1) | 45 (25.6)  | 75 (21.9)  |        |
| Parity                     |            |            |            |        |
| 0                          | 153 (29.5) | 50 (28.4)  | 103 (30)   | 0.622  |
| 1-4                        | 316 (60.9) | 106 (60.2) | 210 (61.2) |        |
| ≥5                         | 50 (9.6)   | 20 (11.4)  | 30 (8.7)   |        |
| Previous abortion          |            |            |            | 0.158  |
| yes                        | 156 (30.1) | 60 (34.1)  | 96 (28.0)  |        |
| no                         | 363 (69.9) | 116 (65.9) | 247 (72.0) |        |
| Previous stillbirth        |            |            |            | 0.068  |
| yes                        | 53 (10.2)  | 24 (13.6)  | 29 (8.5)   |        |
| no                         | 466 (89.8) | 152 (86.4) | 314 (91.5) |        |
| Poor birth spacing         |            |            |            | 0.815  |
| yes                        | 100 (19.3) | 35 (19.9)  | 65 (19.0)  |        |
| no                         | 419 (80.7) | 141 (80.1) | 278 (81)   |        |
| Previous caesarean section |            |            |            | 0.592  |
| yes                        | 15 (2.9)   | 6 (3.4)    | 9 (2.6)    |        |
| no                         | 504 (97.1) | 170 (96.6) | 334 (97.4) |        |
| <b>ANC</b>                 |            |            |            |        |
| GA at first ANC visit      |            |            |            | 0.835  |
| ≤12                        | 272 (62.4) | 91 (61.5)  | 181 (62.8) |        |
| >12                        | 164 (37.6) | 57 (38.5)  | 107 (37.2) |        |
| Number of ANC visits       |            |            |            | <0.001 |
| 1-4                        | 75 (14.6)  | 31 (18.1)  | 44 (12.9)  |        |
| 5-7                        | 237 (46.2) | 101 (59.1) | 136 (39.8) |        |
| ≥ 8                        | 201 (39.2) | 39 (22.8)  | 162 (47.4) |        |
| Obstetric ultrasound       |            |            |            | 0.777  |
| yes                        | 212 (40.8) | 106 (60.2) | 201 (58.6) |        |
| no                         | 208 (40.4) | 70 (39.8)  | 142 (41.4) |        |
| Twin pregnancy             |            |            |            | <0.001 |
| yes                        | 34 (6.6)   | 24 (13.6)  | 10 (2.9)   |        |
| no                         | 485 (93.4) | 152 (86.4) | 333 (97.1) |        |

308

|                  |            |            |            |       |
|------------------|------------|------------|------------|-------|
| Maternal anaemia |            |            |            | 0.978 |
| yes              | 161 (31)   | 54 (30.7)  | 107 (31.2) |       |
| no               | 240 (46.2) | 81 (46)    | 159 (46.4) |       |
| not done         | 118 (22.7) | 41 (23.3)  | 77 (22.4)  |       |
| Bacteriuria      |            |            |            | 0.212 |
| yes              | 155 (29.9) | 44 (25.0)  | 111 (32.4) |       |
| no               | 207 (39.9) | 74 (42.0)  | 133 (38.8) |       |
| not done         | 157 (30.3) | 58 (33.0)  | 99 (28.9)  |       |
| Hyperglycaemia   |            |            |            | 0.538 |
| yes              | 16 (3.1)   | 7 (4.0)    | 9 (2.6)    |       |
| no               | 346 (66.7) | 113 (64.2) | 233 (67.9) |       |
| not done         | 157 (30.3) | 56 (31.8)  | 101 (29.4) |       |
| Malaria          |            |            |            | 1.000 |
| yes              | 3 (0.6)    | 1 (0.6)    | 2 (0.6)    |       |
| no               | 385 (74.2) | 131 (74.4) | 254 (74.1) |       |
| not done         | 131 (25.2) | 44 (25)    | 87 (25.4)  |       |



|          |            |            |            |       |
|----------|------------|------------|------------|-------|
| HIV      |            |            |            | 1.000 |
| yes      | 3 (0.6)    | 1 (0.6)    | 2 (0.6)    |       |
| no       | 486 (99.4) | 164 (99.4) | 322 (99.4) |       |
| Syphilis |            |            |            | 0.340 |
| yes      | 5 (1.1)    | 3 (1.9)    | 2 (0.6)    |       |
| no       | 463 (98.9) | 154 (98.1) | 309 (99.4) |       |
| HsbAg    |            |            |            | 0.810 |
| yes      | 16 (3.1)   | 4 (2.3)    | 12 (3.5)   |       |
| no       | 300 (57.8) | 103 (58.5) | 197 (57.4) |       |
| not done | 203 (39.1) | 69 (39.2)  | 134 (39.1) |       |

309

| <b>Health facility-related factors</b>                |            |            |            |              |
|-------------------------------------------------------|------------|------------|------------|--------------|
| Baby delivered at HAM                                 |            |            |            | 0.592        |
| yes                                                   | 504 (97.1) | 170 (96.6) | 334 (97.4) |              |
| no                                                    | 15 (2.9)   | 6 (3.4)    | 9 (2.6)    |              |
| Transferred from another unit*                        |            |            |            | <b>0.009</b> |
| yes                                                   | 21 (4.0)   | 13 (7.4)   | 8 (2.3)    |              |
| no                                                    | 498 (96)   | 163 (92.6) | 335 (97.7) |              |
| Delivery assisted by                                  |            |            |            | <b>0.011</b> |
| obstetrician                                          | 84 (16.2)  | 39 (22.8)  | 45 (13.5)  |              |
| midwife                                               | 421 (83.4) | 132 (77.2) | 289 (86.5) |              |
| <b>Intrapartum complications and mode of delivery</b> |            |            |            |              |
| Foetal malpresentation                                |            |            |            | 0.607        |
| yes                                                   | 4 (0.8)    | 2 (1.1)    | 2 (0.6)    |              |
| no                                                    | 515 (99.2) | 174 (98.9) | 341 (99.4) |              |
| PROM                                                  |            |            |            |              |
| yes                                                   | 38 (7.3)   | 22 (12.5)  | 16 (4.7)   | <b>0.002</b> |
| no                                                    | 481 (92.7) | 154 (87.5) | 327 (95.3) |              |
| Pre/Eclampsia                                         |            |            |            | <b>0.029</b> |
| yes                                                   | 37 (7.1)   | 19 (10.8)  | 18 (5.2)   |              |
| no                                                    | 482 (92.9) | 157 (89.2) | 325 (94.8) |              |
| Meconium-stained amniotic fluid                       |            |            |            | <b>0.027</b> |
| yes                                                   | 90 (17.3)  | 40 (22.7)  | 50 (14.6)  |              |
| no                                                    | 429 (82.7) | 136 (77.3) | 293 (85.4) |              |
| Umbilical cord complication                           |            |            |            | 0.355        |
| yes                                                   | 34 (6.6)   | 14 (8.0)   | 20 (5.8)   |              |
| no                                                    | 485 (93.4) | 162 (92)   | 323 (94.2) |              |
| Obstructed labour                                     |            |            |            | 0.122        |
| yes                                                   | 52 (10)    | 23 (13.1)  | 29 (8.5)   |              |
| no                                                    | 467 (90)   | 153 (86.9) | 314 (91.5) |              |
| Postpartum haemorrhage                                |            |            |            | 0.339        |
| yes                                                   | 1 (0.2)    | 1 (0.6)    | 0          |              |
| no                                                    | 518 (99.8) | 175 (99.4) | 343 (100)  |              |
| Normal Vaginal delivery                               |            |            |            | <b>0.034</b> |
| yes                                                   | 433 (83.4) | 138 (78.4) | 295 (86.0) |              |
| no                                                    | 86 (16.6)  | 38 (21.6)  | 48 (14.0)  |              |
| Caesarean section                                     |            |            |            | <b>0.039</b> |
| yes                                                   | 79 (15.2)  | 35 (19.9)  | 44 (12.8)  |              |
| no                                                    | 440 (84.8) | 141 (80.1) | 299 (87.2) |              |

|                               |            |            |            |       |
|-------------------------------|------------|------------|------------|-------|
| Instrumental vaginal delivery |            |            |            | 0.694 |
| yes                           | 7 (1.3)    | 3 (1.7)    | 4 (1.2)    |       |
| no                            | 512 (98.7) | 173 (98.3) | 339 (98.8) |       |

310

| <b>Newborns characteristics and complications</b> |            |            |            |                  |
|---------------------------------------------------|------------|------------|------------|------------------|
| Gestational Age                                   |            |            |            |                  |
| <32                                               | 16 (3.1)   | 16 (9.1)   | 0          | <b>&lt;0.001</b> |
| 32 a 37                                           | 76 (14.6)  | 76 (43.2)  | 0          |                  |
| 38-41                                             | 350 (67.4) | 65 (36.9)  | 285 (83.1) |                  |
| ≥41                                               | 77 (14.8)  | 19 (10.8)  | 58 (16.9)  |                  |
| Sex                                               |            |            |            | 0.308            |
| feminine                                          | 253 (48.7) | 80 (45.5)  | 173 (50.4) |                  |
| masculine                                         | 266 (51.3) | 96 (54.5)  | 170 (49.6) |                  |
| Birth weight                                      |            |            |            | <b>&lt;0.001</b> |
| <1500 g                                           | 17 (3.3)   | 17 (9.7)   | 0          |                  |
| 1500-2499 g                                       | 66 (12.7)  | 66 (37.5)  | 0          |                  |
| 2500 -3999 g                                      | 415 (80)   | 72 (40.9)  | 343 (100)  |                  |
| ≥ 4000g                                           | 21 (4.0)   | 21 (11.9)  | 0          |                  |
| IUGR                                              |            |            |            | <b>&lt;0.001</b> |
| yes                                               | 21 (4.0)   | 18 (10.2)  | 3 (0.9)    |                  |
| no                                                | 498 (96)   | 158 (89.8) | 340 (99.1) |                  |
| Infectious risk                                   |            |            |            | <b>&lt;0.001</b> |
| yes                                               | 117 (22.5) | 62 (35.2)  | 55 (16)    |                  |
| no                                                | 402 (77.5) | 114 (64.8) | 288 (84)   |                  |

311

|                                  |            |            |            |                  |
|----------------------------------|------------|------------|------------|------------------|
| Neonatal resuscitation performed |            |            |            | <b>&lt;0.001</b> |
| yes                              | 28 (5.4)   | 26 (14.8)  | 2 (0.6)    |                  |
| no                               | 491 (94.6) | 150 (85.2) | 341 (99.4) |                  |
| Foetal distress at birth         |            |            |            | <b>&lt;0.001</b> |
| yes                              | 103 (19.8) | 72 (40.9)  | 31 (9.0)   |                  |
| no                               | 416 (80.2) | 104 (59.1) | 312 (91.0) |                  |
| Admission at NCU                 |            |            |            | <b>&lt;0.001</b> |
| yes                              | 70 (13.5)  | 64 (36.4)  | 6 (1.7)    |                  |
| no                               | 449 (86.5) | 112 (63.6) | 337 (98.3) |                  |
| Received antibiotic              |            |            |            | <b>&lt;0.001</b> |
| yes                              | 112 (21.6) | 72 (40.9)  | 40 (11.7)  |                  |
| no                               | 407 (78.4) | 104 (59.1) | 303 (88.3) |                  |

312 Bold text for p-value ≤0.05

313 Abbreviations: GA – gestational age; ANC – antenatal care; PROM – prolonged rupture of membranes; IUGR – intrauterine

314 growth restriction; NCU – neonatal care unit; HAM – Hospital Dr. Ayres de Menezes

315

316

317

318

### 319 **Factors associated with adverse birth outcomes**

320 Univariable binary logistic regression was performed to assess the association of ABOs with different  
321 characteristics (Table 3). Crude analysis showed that eight or more ANC visits (cOR 0.34, 95% CI 0.19-  
322 0.61) and delivery assisted by a midwife (cOR 0.53, 95% CI 0.33-0.85) were ABO protective factors.  
323 Among the intrapartum factors, prolonged rupture of membranes (cOR 2.92, 95% CI 1.49-5.72),  
324 preeclampsia (cOR 2.19, 95% CI 1.12-4.28) and meconium-stained amniotic fluid (cOR 1.72, 95% CI  
325 1.09-2.74) were significantly associated with adverse birth outcomes. Regarding the mode of delivery,  
326 not having a normal vaginal delivery (cOR 1.69, 95% CI 1.06-2.71) and cesarean section (cOR 1.69, 95%  
327 CI 1.04-2.75) were associated with a higher ABO risk. The odds of having ABO were five times higher  
328 among twin pregnancies (cOR 5.26, 95% CI 2.45-11.27).

329 Newborns with intrauterine growth restriction had thirteen-fold higher odds of ABO (cOR 12.91, 95%  
330 CI 3.75-44.47), and newborns with an infectious risk had three-fold higher odds of ABO (cOR 2.85, 95%  
331 CI 1.87-4.35).

332 Performance of neonatal resuscitation (cOR 29.55, 95% CI 6.93-126.11), fetal distress at birth (APGAR  
333 score at first- minute inferior to seven) (cOR 6.97, 95% CI 4.33-11.22), admission to the neonatal care  
334 unit (cOR 32.10, 95% CI 13.53-76.13) and receiving intravenous antibiotic treatment (cOR 5.24, 95%  
335 CI 3.36-8.19) were all related to increased odds of adverse birth outcomes.

336 Other factors related to the newborn outcomes, such as experiencing fetal distress at birth, needing  
337 resuscitation maneuvers, intrauterine growth restriction, being admitted to the neonatal unit care,  
338 and receiving antibiotic treatment, were all identified as high-risk for an adverse birth outcome in the  
339 univariable analysis. Taking into consideration the definition used to select the cases in this study -  
340 PTB, LBW, macrosomia, congenital anomalies, sepsis, and asphyxia – all of the above neonatal factors  
341 were related as a consequence of the case definition and therefore were not included in the  
342 multivariable model.

343 **Multivariable model**

344 The variables that were candidates for the multivariable model were number of ANC visits, twin  
345 pregnancy, delivery assisted by midwives or obstetricians, preeclampsia, PROM, obstructed labor,  
346 cesarean section, meconium-stained amniotic fluid, and infectious risk.

347

348 Twin pregnancy (aOR 4.92, 95% CI 2.25-10.74; p<0.001), PROM (aOR 3.43, 95% CI 1.69-6.95, p=0.001),  
349 meconium-stained amniotic fluid (aOR 1.59, 95% 0.97-2.62, p=0.068) and fewer than eight ANC visits  
350 (aOR 0.33, 95% CI 0.18-0.60, p<0.001) were independently associated with adverse birth outcomes  
351 (Table 3).

352

353 **Table 3** Factors associated with adverse birth outcomes among newborns delivered at HAM in Sao  
354 Tome & Principe

| Variables                               | ABO<br>n= 176<br>n (%) | no-ABO<br>n= 343<br>n (%) | cOR (95% CI)         | p-value | aOR (95% CI) p-value          |
|-----------------------------------------|------------------------|---------------------------|----------------------|---------|-------------------------------|
| <b>Sociodemographic characteristics</b> |                        |                           |                      |         |                               |
| <b>Maternal education</b>               |                        |                           |                      |         |                               |
| none                                    | 7 (4)                  | 12 (3.5)                  | 1                    |         |                               |
| primary                                 | 111 (63.1)             | 187 (54.5)                | 1.018 (0.389-2.661)  | 0.972   |                               |
| secondary                               | 40 (22.7)              | 126 (36.7)                | 0.544 (0.201-1.476)  | 0.232   |                               |
| higher                                  | 18 (10.2)              | 18 (5.2)                  | 1.71 (0.549-5.351)   | 0.353   |                               |
| <b>ANC</b>                              |                        |                           |                      |         |                               |
| <b>Number of ANC visits</b>             |                        |                           |                      |         |                               |
| 1-4                                     | 31 (18.1)              | 44 (12.9)                 | 1                    |         |                               |
| 5-7                                     | 101 (59.1)             | 136 (39.8)                | 1.054 (0.622-1.785)  | 0.845   | 1.028 (0.594-1.778), p=0.922  |
| ≥ 8                                     | 39 (22.8)              | 162 (47.4)                | 0.342 (0.192-0.609)  | <0.001  | 0.331 (0.182-0.603), p <0.001 |
| <b>Twin pregnancy</b>                   |                        |                           |                      |         |                               |
| yes                                     | 24 (13.6)              | 10 (2.9)                  | 5.258 (2.453-11.268) | <0.001  | 4.916 (2.251-10.737) p <0.001 |
| no                                      | 152 (86.4)             | 333 (97.1)                | 1                    |         |                               |
| <b>Intrapartum complications</b>        |                        |                           |                      |         |                               |
| <b>PROM</b>                             |                        |                           |                      |         |                               |
| yes                                     | 22 (12.5)              | 16 (4.7)                  | 2.92 (1.491-5.716)   | 0.002   | 3.429 (1.693-6.946), p=0.001  |
| no                                      | 154 (87.5)             | 327 (95.3)                | 1                    |         |                               |
| <b>Pre/Eclampsia</b>                    |                        |                           |                      |         |                               |
| yes                                     | 19 (10.8)              | 18 (5.2)                  | 2.185 (1.116-4.280)  | 0.023   |                               |
| no                                      | 157 (89.2)             | 325 (94.8)                | 1                    |         |                               |
| <b>Meconium-stained amniotic fluid</b>  |                        |                           |                      |         |                               |
| yes                                     | 40 (22.7)              | 50 (14.6)                 | 1.724 (1.085-2.738)  | 0.021   | 1.590 (0.966-2.618), p=0.068  |
| no                                      | 136 (77.3)             | 293 (85.4)                | 1                    |         |                               |

|                                        |            |            |                        |        |  |
|----------------------------------------|------------|------------|------------------------|--------|--|
| <b>Health facility-related factors</b> |            |            |                        |        |  |
| Transferred from another unit*         |            |            |                        |        |  |
| yes                                    | 13 (7.4)   | 8 (2.3)    | 3.340 (1.357-8.218)    | 0.009  |  |
| no                                     | 163 (92.6) | 335 (97.7) | 1                      |        |  |
| Delivery assisted by                   |            |            |                        |        |  |
| obstetrician                           | 39 (22.8)  | 45 (13.5)  | 1                      |        |  |
| midwife                                | 132 (77.2) | 289 (86.5) | 0.527 (0.328-0.848)    | 0.008  |  |
| Normal Vaginal delivery                |            |            |                        |        |  |
| yes                                    | 138 (78.4) | 295 (86)   | 1                      |        |  |
| no                                     | 38 (21.6)  | 48 (14.0)  | 1.692 (1.056-2.711)    | 0.029  |  |
| Cesarean section                       |            |            |                        |        |  |
| yes                                    | 35 (19.9)  | 44 (12.8)  | 1.687 (1.037-2.745)    | 0.035  |  |
| no                                     | 141 (80.1) | 299 (87.2) | 1                      |        |  |
| <b>Newborns complications*</b>         |            |            |                        |        |  |
| IUGR                                   |            |            |                        |        |  |
| yes                                    | 18 (10.2)  | 3 (0.9)    | 12.911 (3.749-44.471)  | <0.001 |  |
| no                                     | 158 (89.8) | 340 (99.1) | 1                      |        |  |
| Infectious risk                        |            |            |                        |        |  |
| yes                                    | 62 (35.2)  | 55 (16.0)  | 2.848 (1.866-4.347)    | <0.001 |  |
| no                                     | 114 (64.8) | 288 (84.0) | 1                      |        |  |
| Neonatal resuscitation                 |            |            |                        |        |  |
| yes                                    | 26 (14.8)  | 2 (0.6)    | 29.553 (6.926-126.113) | <0.001 |  |
| no                                     | 150 (85.2) | 341 (99.4) | 1                      |        |  |
| Fetal distress at birth*               |            |            |                        |        |  |
| yes                                    | 72 (40.9)  | 31 (9.0)   | 6.968 (4.329-11.215)   | <0.001 |  |
| no                                     | 104 (59.1) | 312 (91.0) | 1                      |        |  |
| Admission at NCU                       |            |            |                        |        |  |
| yes                                    | 64 (36.4)  | 6 (1.7)    | 32.095 (13.531-76.127) | <0.001 |  |
| no                                     | 112 (63.6) | 337 (98.3) | 1                      |        |  |
| Received antibiotic                    |            |            |                        |        |  |
| yes                                    | 72 (40.9)  | 40 (11.7)  | 5.244 (3.357-8.193)    | <0.001 |  |
| no                                     | 104 (59.1) | 303 (88.3) | 1                      |        |  |

355 Abbreviations: ANC – antenatal care; PROM – prolonged rupture of membranes; IUGR – intrauterine growth restriction; NCU

356 – neonatal care unit; cOR: crude odds ratio; aOR – adjusted odds ratio; CI – confidence interval

357 \* neonatal complications were related as a consequence of the case definition and therefore were not included in the

358 multivariable model.

## 359 Discussion

---

360

361 Assessing neonatal adverse birth outcomes and identifying contributing factors can help avoid  
362 neonatal mortality and morbidity thoroughly and thoughtfully. As a result, the goal of this study was  
363 to identify the factors related to ABO in neonates admitted at birth to HAM, in the capital city of Sao  
364 Tome & Principe. The lack of complete ANC follow-up, multiple births (twins), meconium-stained  
365 amniotic fluid and PROM were all identified as significant associated factors for adverse birth  
366 outcomes in the current study.

367 This study showed a rate of 17.7% prematurity and 16% low birth weight, which are higher than the  
368 published estimates for Sao Tome & Principe of 12% PTB and 6.6% LBW [2,41,42]. This finding can be  
369 related to the fact that gestational age in the country, similar to other studies conducted in LMICs, is  
370 mainly estimated based on the last menstrual period [12,42]. Thus, errors in precise date reporting  
371 would lead to misclassification of outcomes related to prematurity. Regarding LBW rates in the  
372 country, the source used is the UNICEF Multiple Indicator Cluster Surveys (MICS) [20,21]. MICS data  
373 rely upon the information provided by the mother about last birth in the previous two years and are  
374 associated with a higher risk of recall bias; therefore, these rate discrepancies between this study and  
375 official STP data can be linked to the above reasons. The lack of difference between the rate of PTB  
376 and LBW in this study is in line with the studies done in Nepal [43], Ethiopia [44] and Kenya [14] as  
377 biologically, a preterm baby has a higher risk of having a low birth weight as they are less likely to get  
378 sufficient time for maturity, growth, and nutrient intake. Another important consideration is that most  
379 PTBs in this study were “late preterm” (76/92), often associated with a normal postnatal clinical course  
380 with no relevant complications, when compared to the very preterm babies (16/92) [45].

381

382 The 1.5% congenital malformation, 4% macrosomia and 4% neonatal probable sepsis rates found in  
383 this study are similar to the rates described by other LMICs [45].

384

385 In developing countries, the incidence of neonatal septicemia ranges from 1.6% to 3.8% of all live  
386 births, considering that the neonatal sepsis definition varies, and most countries are not able to have  
387 a microbiological confirmation, such as STP [46,47]. Moreover, the rates of neonatal sepsis in STP are  
388 probably much higher since we only included babies diagnosed while admitted to the maternity unit.  
389 Most babies were discharged between the 24<sup>th</sup> and 36<sup>th</sup> hours of life; thus, all those with late-onset  
390 sepsis were missed from this study.

391

392 The 8.1% prevalence of birth asphyxia found in this study is lower when compared to other LMICs: a  
393 study in Ethiopia reports a pooled prevalence of 22.52%, 18% in other East African countries and 9.1%  
394 in some Central African countries [48]. The lower burden of asphyxia in STP may be due to differences  
395 in case definition, as in this study, birth asphyxia was only based on a fifth minute APGAR score less  
396 than 7, whereas other studies also use other criteria, such as umbilical cord pH < 7- or 20-min Apgar  
397 score less than 7 or multiorgan failure in the first 72 h or convulsion in the first 24 h of life [48]. In turn,  
398 APGAR scoring is vulnerable to midwife evaluation and therefore susceptible to higher scoring for  
399 better health-related outcomes of the delivery she assisted.

400

401 The fivefold higher risk of multiple pregnancies having ABO, can be associated with the fact that  
402 monochorionic pregnancies have a vascular anastomosis within the placenta, affecting the perfusion  
403 of each twin and promoting adverse outcomes such as preterm labor, premature rupture of  
404 membranes, antepartum hemorrhage and fetal death. Adverse outcomes in twin pregnancies were  
405 also reported in other studies [49,50]. Some studies describe that twin pregnancies have a thirteen-  
406 fold increase in rates of stillbirth in monochorionic pregnancies and a five-fold increase in dichorionic  
407 twins compared with singleton pregnancies [51]. Hence, the association between multiple  
408 pregnancies and ABO in this study reveals the importance of screening for multiple pregnancies as  
409 one key component of ANC to reduce the risk of ABO [49]. Other interventions to reduce ABO related  
410 to twin pregnancies that can be recommended in STP are delivery at 37 weeks gestation in

411 uncomplicated dichorionic twin pregnancies and delivery at 36 weeks in monochorionic pregnancies,  
412 as proposed by some authors [51].

413

414 In this study, complete ANC with eight or more visits was a protective factor, which should be  
415 expected, since antenatal care is the most important practice for mothers to obtain more information  
416 about nutrition and health, to perform screenings and to learn about danger signs regarding  
417 pregnancy and childbirth. If a mother lacks ANC, minor obstetric conditions are not detected and  
418 managed early; therefore, serious complications and ABO will likely develop [52]. Our finding is similar  
419 to the results from Ethiopia and other LMICs, in which adverse birth outcomes, especially PTB and  
420 LBW, were higher among mothers with limited ANC visits [8,18,53]. The recommendation of eight or  
421 more ANC contacts was only introduced in 2016 by the World Health Organization (WHO) since studies  
422 at that time concluded that eight or more ANC contacts could reduce perinatal deaths by up to 8 per  
423 1000 births when compared to only 4 visits, as previously recommended by the WHO for LMICs [54].

424

425 To highlight that this study, in matter of ANC screenings completion, revealed that from all the  
426 mothers, a total of 22.7%, 30% and 30% had no screening for anemia, bacteriuria or hyperglycemia  
427 done throughout the pregnancy. Therefore, the Ministry of Health of STP should give more attention  
428 to expanding antenatal care and create awareness about the importance of a complete ANC follow-  
429 up, not only in terms of number of visits but also in terms of completion of all the evidence-based  
430 recommended screenings.

431

432 The rate of pregnancies with meconium-stained amniotic fluid in this study (17.3%) is similar to the  
433 international standard and from other studies in LMICs [10]. The occurrence of meconium-stained  
434 amniotic fluid during labor has long been considered a predictor of adverse birth outcomes and an  
435 important sign of fetal distress being associated with the rates of neonatal resuscitation, respiratory  
436 distress, lower Apgar score, birth asphyxia, neonatal care unit admissions and meconium aspiration



437 syndrome [10,55]. Additionally, approximately 5–10% of neonates with meconium will experience  
438 meconium aspiration syndrome, which accounts for approximately 12% of neonatal mortality (as  
439 much as a 40% case fatality rate for the neonate and around 2% of perinatal mortality) as well as for  
440 neonatal sepsis and pulmonary disease, representing an important risk factor not only for ABO but  
441 also for a death outcome [10,55]. Odds of experiencing an ABO, in this study, were identified as being  
442 approximately twofold higher among a meconium-stained fluid compared with a clear amniotic fluid  
443 at birth. Hence, early detection by using a latent follow-up chart and partograph and timely  
444 intervention is recommended to reduce this significant risk factor [10]. Some authors even propose a  
445 cesarean section when there is a thick meconium-stained amniotic fluid to ensure a better outcome  
446 for the neonate even in the presence of normal fetal heart rate tracings on cardiotocography [55].

447 PROM was defined as rupture of the membrane lasting more than 18 hours before labor. The overall  
448 rate in this study was 7.3%, which is in line with the estimated 5%-10% of all pregnancies in LMICs  
449 [56,57]. It was also identified as a significant risk factor for ABO, with a threefold higher risk compared  
450 to newborns without PROM. This is a well-known risk factor associated with early onset neonatal  
451 sepsis and increased risk for perinatal mortality. Thus, preventive measures should focus on the  
452 recognition of these high-risk newborns with early treatment with empirical antibiotics. Such  
453 approaches would be a safe and cost-effective strategy, especially in STP where there are no  
454 laboratory culture techniques available [56,58].

455 Studies differ in their observations on risk, and contrary to expectations, no association was found  
456 with the sociodemographic maternal characteristics, and there was no relationship between ABO and  
457 the maternal sanitation behavior and type of access to water, as reported in other LMICs studies  
458 [15,59].

459

460

461 **Strengths and limitations**

462 In this study, the researcher retrieved all clinical pregnancy-related information, namely, ANC  
463 screening results, frequency of ANC visits, labor mode of delivery and complications, as well as  
464 postpartum care from ANC cards and maternity registers to limit recall bias. The selection of cases and  
465 controls was performed by an experienced pediatrician; therefore, it is less likely that this study has  
466 misclassification biases both in the exposure and case–control categories.

467 Regarding the limitations, maternal factors such as gestational weight gain, BMI, and height were not  
468 included in this study, as these measurements are not included in the ANC follow-up in STP, missing  
469 key mediators for birth outcomes, as well as strong risk factors for other pregnancy complications  
470 [12]. Intrapartum factors, such as antenatal steroids and maternal prophylactic antibiotics, were also  
471 not assessed in this study.

472 The pathogenesis of each of the adverse birth outcomes is multifactorial and we have not identified  
473 the specific exposure pathways, such as the incidence of vertical transmission through the birth canal  
474 of *group B Streptococcus* or *Escherichia coli*. Additionally, neonatal sepsis diagnosis was not made by  
475 positive culture techniques due to country-resource constraints, which may play a role in our observed  
476 outcomes. Previous pregnancy outcomes of PTB or LBW were also not assessed in this study, missing  
477 the opportunity to evaluate the recurrence of these ABO compared to those without previous  
478 histories of PTB or LBW [6,9].

479 Notwithstanding these limitations, the study is a first step in the description of adverse birth outcomes  
480 among newborns in this resource-constrained setting.

## 481 Conclusions

---

482

483 The high prevalence of adverse birth outcomes in the HAM maternity unit at Sao Tome & Principe  
484 could be reduced through the provision of a high-quality ANC and intrapartum care throughout the  
485 continuum of care, as fewer than eight ANC visits, twin pregnancy, meconium-stained amniotic fluid  
486 and PROM were all identified as significant risk factors for ABOs in this study.

487 The modifiable risk factors documented in this analysis should be considered in cost-effectiveness  
488 interventions that would improve birth outcomes in Sao Tome & Principe. Reducing the ABO burden  
489 will not only impact neonatal mortality rates but will also promote child well-being, growth, and  
490 favorable health outcomes across their life course and provide substantial population-level human  
491 capital returns in Sao Tome & Principe.

492

493

494

## 495 Acknowledgments

496 A special remark for the late Professor João Luís Baptista PhD MD - AV research cosupervisor - a  
497 great man who was a thinker and a fighter for Africa's improvement of public health. We are  
498 indebted to all the women who participated in the study. The authors would like to thank Elizabeth  
499 Carvalho and the 1) medical team and nurses of Hospital Dr. Ayres de Menezes Maternity for their  
500 support, especially to the chief-nurse Paulina Oliveira, and 2) Ana Sequeira, Rita Coelho, Ana  
501 Margalha, Ana Castro, Alexandra Coelho, and Inês Gomes for field support. We would like to  
502 acknowledge Instituto Camões, I.P. for the logistic support in Sao Tome & Principe.

503

504

## 505 References

---

- 506 1. Adane, et al. Adverse birth outcomes among deliveries in Gonder university hospital, Northwest  
507 Ethiopia. BMC Pregnancy Childbirth. 2014;14:90. <http://www.biomedcentral.com/1471-2393/14/90>
- 508 2. Blakstad MM, Perumal N, Bliznashka L, et al. Large gains in schooling and income are possible from  
509 minimizing adverse birth outcomes in 121 low- and middle-income countries: A modelling study. PLOS  
510 Glob Public Health. 2022;2(6):e0000218. <https://doi.org/10.1371/journal.pgph.0000218>
- 511 3. Lawn JE, Kerber K, Enweronu-Laryea C, Masee Bateman O. Newborn survival in low resource  
512 settings—are we delivering?. BJOG: An International Journal of Obstetrics & Gynaecology.  
513 2009;116:49-59.
- 514 4. Tsegaye, Kassa. Prevalence of adverse birth outcome and associated factors among women who  
515 delivered in Hawassa town governmental health institutions, South Ethiopia, in 2017. Reprod Health.  
516 2018;15:193 <https://doi.org/10.1186/s12978-018-0631-3>
- 517 5. Kaforau LSK, Tessema GA, Jancey J, et al. Prevalence and risk factors of adverse birth outcomes in  
518 the Pacific Island region: a scoping review protocol. BMJ Open 2021;11:e042423.  
519 <https://doi:10.1136/bmjopen-2020-042423>
- 520 6. Su D, Samson K, Garg A, Hanson C, Berry AL, Lin G, Qu M. Birth history as a predictor of adverse  
521 birth outcomes: Evidence from state vital statistics data. Preventive medicine reports. 2018;11:63-8.
- 522 7. Lule S, Elliott A, Smeeth L, Webb E: Is birth weight associated with blood pressure among African  
523 children and adolescents? A systematic review. Journal of developmental origins of health and  
524 disease 2018:1–11.
- 525 8. Hailemichael HT, Debelew GT, Alema H, et al. Determinants of adverse birth outcome in Tigray  
526 region, North Ethiopia: Hospital-based case-control study. BMC Pediatrics. 2020;20, 10.  
527 <https://doi.org/10.1186/s12887-019-1835-6>
- 528 9. Bane S, Simard JF, Wall-Wieler E, et al. Subsequent risk of stillbirth, preterm birth, and small for  
529 gestational age: A cross-outcome analysis of adverse birth outcomes. Paediatric and Perinatal  
530 Epidemiology. 2022.
- 531 10. Addisu D, Asres A, Gedefaw G. et al. Prevalence of meconium stained amniotic fluid and its  
532 associated factors among women who gave birth at term in Felege Hiwot comprehensive specialized  
533 referral hospital, North West Ethiopia: a facility based cross-sectional study. BMC Pregnancy  
534 Childbirth 18, 429 (2018). <https://doi.org/10.1186/s12884-018-2056-y>
- 535 11. Bright A, Parrott M, Martin S, et al. Streamlining Universal Prenatal Screening for Risk for Adverse  
536 Birth Outcomes. Matern Child Health J 26, 1022–1029 (2022). <https://doi.org/10.1007/s10995-022-03420-7>
- 537
- 538 12. Yang J, Wang M, Tobias DK, et al. Dietary diversity and diet quality with gestational weight gain  
539 and adverse birth outcomes, results from a prospective pregnancy cohort study in urban Tanzania.  
540 Maternal & Child Nutrition. 2022;18(2):e13300.
- 541 13. Caniglia EC, Zash R, Swanson SA, et al. Iron, folic acid, and multiple micronutrient  
542 supplementation strategies during pregnancy and adverse birth outcomes in Botswana. The Lancet  
543 Global Health. 2022;10(6):e850-61.

- 544 14. KC A, Basel PL, Singh S. Low birth weight and its associated risk factors: Health facility-based case-  
545 control study. PloS one. 2020;15(6):e0234907. <https://doi.org/10.1371/journal.pone.0234907>
- 546 15. Padhi BK, Baker KK, Dutta A, et al. Risk of adverse pregnancy outcomes among women practicing  
547 poor sanitation in rural India: a population-based prospective cohort study. PLoS Med.  
548 2015;12(7):e1001851. <https://doi.org/10.1371/journal.pmed.1001851>
- 549 16. Kikuchi K, Okawa S, Zamawe COF, et al. (2016) Effectiveness of Continuum of Care—Linking  
550 PrePregnancy Care and Pregnancy Care to Improve Neonatal and Perinatal Mortality: A Systematic  
551 Review and Meta-Analysis. PLoS ONE 11(10): e0164965. <https://doi.org/10.1371/journal.pone.0164965>
- 552 17. Younger A, Alkon A, Harknett K, et al. Adverse birth outcomes associated with household air  
553 pollution from unclean cooking fuels in low-and middle-income countries: A systematic review.  
554 Environmental research. 2022;204:112274.
- 555 18. Abadiga M, Mosisa G, Tsegaye R, et al. Determinants of adverse birth outcomes among women  
556 delivered in public hospitals of Ethiopia, 2020. Archives of Public Health. 2022;80(1):1-7.  
557 <https://doi.org/10.1186/s13690-021-00776-0>
- 558 19. Sao Tome and Principe WHO statistical profile. WHO Libr. 2015.  
559 <https://www.who.int/gho/countries/stp>
- 560 20. INE e UNICEF. 2020. Inquérito de Indicadores Múltiplos 2019, Relatório final. São Tomé, São  
561 Tomé e Príncipe: Instituto Nacional de Estatística e Fundo das Nações Unidas para a Infância.  
562 Available at: [https://mics-surveys-](https://mics-surveys-prod.s3.amazonaws.com/MICS6/West%20and%20Central%20Africa/Sao%20Tome%20and%20Principe/2019/Survey%20findings/Sao%20Tome%20e%20Principe%202019%20MICS%20Survey%20Findings%20Report_Portuguese.pdf)  
563 [prod.s3.amazonaws.com/MICS6/West%20and%20Central%20Africa/Sao%20Tome%20and%20Principe/2019/Survey%20findings/Sao%20Tome%20e%20Principe%202019%20MICS%20Survey%20Findings%20Report\\_Portuguese.pdf](https://mics-surveys-prod.s3.amazonaws.com/MICS6/West%20and%20Central%20Africa/Sao%20Tome%20and%20Principe/2019/Survey%20findings/Sao%20Tome%20e%20Principe%202019%20MICS%20Survey%20Findings%20Report_Portuguese.pdf)  
564 [gs%20Report\\_Portuguese.pdf](https://mics-surveys-prod.s3.amazonaws.com/MICS6/West%20and%20Central%20Africa/Sao%20Tome%20and%20Principe/2019/Survey%20findings/Sao%20Tome%20e%20Principe%202019%20MICS%20Survey%20Findings%20Report_Portuguese.pdf)  
565
- 566 21. UNICEF IN de E (INE) e. Inquérito de Indicadores Múltiplos, São Tome e Principe, MICS-STP, 2014,  
567 Principais resultados. SaoTome, SaoTome e Principe, INE e UNICEF. 2015; Instituto Nacional de  
568 Estatística, 2016. Inquérito aos Indicadores Múltiplos 2014 de São Tomé e Príncipe, Relatório Final.  
569 São Tomé, São Tomé e Príncipe. [http://msgov.st/wp-content/uploads/2019/01/MICS-Final-Report-](http://msgov.st/wp-content/uploads/2019/01/MICS-Final-Report-STP_Portugu%C3%AAs)  
570 [STP\\_Portugu%C3%AAs](http://msgov.st/wp-content/uploads/2019/01/MICS-Final-Report-STP_Portugu%C3%AAs)
- 571 22. Vasconcelos A, Bandeira N, Sousa S, Pereira F, Machado MD. Adolescent pregnancy in Sao Tome  
572 and Principe: a cross-sectional hospital-based study. BMC Pregnancy and Childbirth. 2022;22(1):1-5.
- 573 23. Vasconcelos A, Bandeira N, Sousa S, Machado MC, Pereira F. Adolescent pregnancy in Sao Tome  
574 and Principe: are there different obstetric and perinatal outcomes?. BMC Pregnancy and Childbirth.  
575 2022;22(1):1-1.
- 576 24. Vasconcelos A, Sousa S, Bandeira N, Baptista JL, Machado MD, Pereira F. PO 8592 Why, when  
577 and where do newborns not only get sick but also die in São tomé and Príncipe? A case-control  
578 study. [https://gh.bmj.com/content/4/suppl\\_3/a60.1.abstract](https://gh.bmj.com/content/4/suppl_3/a60.1.abstract)
- 579 25. Mmbaga BT, Lie RT, Olomi R et al. Cause-specific neonatal mortality in a neonatal care unit in  
580 Northern Tanzania: a registry based cohort study. BMC pediatrics. 2012;12(1):1-0.
- 581 26. Mandy GT. Preterm birth: Definitions of prematurity, epidemiology, and risk factors for infant  
582 mortality. UpToDate Retrieved February2017 [https://www.uptodate.com/contents/neonatal-](https://www.uptodate.com/contents/neonatal-complications-outcome-andmanagement-of-multiple-births.2016)  
583 [complications-outcome-andmanagement-of-multiple-births.2016](https://www.uptodate.com/contents/neonatal-complications-outcome-andmanagement-of-multiple-births.2016)

- 584 27. Tchamo ME, Prista A, Leandro CG: Low birth weight, very low birth weight and extremely low  
585 birth weight in African children aged between 0 and 5 years old: a systematic review. *Journal of*  
586 *Developmental Origins of Health and Disease* 2016.
- 587 28. Chibwesa CJ, Zanolini A, Smid M, Vwalika B, Phiri Kasaro M, Mwanahamuntu M, Stringer JSA,  
588 Stringer EM: Predictors and outcomes of low birth weight in Lusaka, Zambia. *International Journal of*  
589 *Gynecology & Obstetrics* 2016, 134(3):309–314.
- 590 29. Belay DM, Bayih WA, Alemu AY, Sinshaw AE, Mekonen DK, Ayele AS, Aytnew TM, Aynew YE,  
591 Hailemichael W, Getu S, Kiros M. Macrosomia and its predictors in pregnant women with diabetes in  
592 Ethiopia. *Tropical Medicine & International Health*. 2021;26(12):1539-52.
- 593 30. American College of Obstetricians and Gynecologists. The Apgar score (Committee Opinion No.  
594 644). *Obstet Gynecol*. 2015;126(4):52-5.
- 595 31. Wosenu L, Worku AG, Teshome DF, Gelagay AA. Determinants of birth asphyxia among live birth  
596 newborns in University of Gondar referral hospital, northwest Ethiopia: A case-control study. *PloS*  
597 *one*. 2018;13(9):e0203763.
- 598 32. Lwanga SK, Lemeshow S. *Sample size determination in health studies: a practical manual*. 1991.
- 599 33. Tewabe T, Mohammed S, Tilahun Y et al. Clinical outcome and risk factors of neonatal sepsis  
600 among neonates in Felege Hiwot referral Hospital, Bahir Dar, Amhara Regional State, North West  
601 Ethiopia 2016: a retrospective chart review. *BMC Res Notes*. 2017;10, 265.  
602 <https://doi.org/10.1186/s13104-017-2573-1>
- 603 34. Popescu CR, Cavanagh MM, Tembo B, et al. Neonatal sepsis in low-income countries:  
604 epidemiology, diagnosis and prevention. *Expert review of anti-infective therapy*. 2020 May  
605 3;18(5):443-52, <https://doi.org/10.1080/14787210.2020.1732818>
- 606 35. Huynh B, Kermorvant-Duchemin E, Herindrainy P et al. Bacterial Infections in Neonates,  
607 Madagascar, 2012–2014. *Emerging Infectious Diseases*. 2018; 24(4), 710-717.  
608 <https://doi.org/10.3201/eid2404.161977>
- 609 36. Mulwooza J, Santos N, Isabirye N et al. Midwife-performed checklist and ultrasound to identify  
610 obstetric conditions at labour triage in Uganda: A quasi-experimental study. *Midwifery*.  
611 2021;96:102949.
- 612 37. Weissmann-Brenner A, Meyer R, Domniz N, et al. The perils of true knot of the umbilical cord:  
613 Antepartum, intrapartum and postpartum complications and clinical implications. *Archives of*  
614 *Gynecology and Obstetrics*. 2022;305(3):573-9.
- 615 38. Chiabi A, Takou V, Mah E, Nguetack S, Siyou H, Takou V, et al. Risk factors for neonatal mortality  
616 at the Yaounde Gynaeco-Obstetric and Pediatric Hospital. Cameroon. *Iranian Journal of Pediatrics*.  
617 2014;24(4):393–400.
- 618 39. Avagliano L, Massa V, Bulfamante G. Meconium-stained amniotic fluid and histologic signs of  
619 fetal distress in stillbirths. *European Journal of Obstetrics & Gynecology and Reproductive Biology*.  
620 2021;266:55-62.
- 621 40. Shaikh S, Shaikh AH, Shaikh SA, Isran B. Frequency of obstructed labor in teenage pregnancy.  
622 *Nepal Journal of Obstetrics and Gynaecology*. 2012;7(1):37-40.
- 623

- 624 41. Blencowe H, Krusevec J, de Onis M, et al. National, regional, and worldwide estimates of low  
625 birthweight in 2015, with trends from 2000: a systematic analysis. *The Lancet global health*.  
626 2019;7(7):e849—e60. pmid:31103470
- 627 42. Chawanpaiboon S, Vogel JP, Moller A-B, Lumbiganon P, Petzold M, Hogan D, et al. Global,  
628 regional, and national estimates of levels of preterm birth in 2014: a systematic review and  
629 modelling analysis. *The Lancet global health*. 2019;7(1):e37—e46. pmid:30389451
- 630 43. Sharma SR, Giri S, Timalcina U, Bhandari SS, Basyal B, Wagle K, et al. Low birth weight at term  
631 and its determinants in a tertiary hospital of Nepal: a case-control study. *PloS one*.  
632 2015;10(4):e0123962. pmid:25853813
- 633 44. Gebremedhin M, Ambaw F, Admassu E, Berhane H. Maternal associated factors of low birth  
634 weight: a hospital based cross-sectional mixed study in Tigray, Northern Ethiopia. *BMC pregnancy*  
635 *and childbirth*. 2015;15:222. pmid:26382941
- 636 45. Lehtonen L, Gimeno A, Parra-Llorca A, Vento M. Early neonatal death: A challenge worldwide.  
637 *Semin Fetal Neonatal Med*. 2017 Jun;22(3):153-160. <https://doi.org/10.1016/j.siny.2017.02.006> Epub  
638 2017 Feb 24. PMID: 28238633.
- 639 46. Noah FN, Doya LJ, Jouni O (2022) Perinatal Risk Factors and Early Onset of Neonatal Sepsis. *Int J*  
640 *Pediatr Res* 8:088. <https://doi.org/10.23937/2469-5769/1510088>
- 641 47. Nyenga AM, Mukuku O and Wembonyama SO. Neonatal sepsis: A review of the literature.  
642 *Theory Clin Pract Pediatr*, 2021, 3(1): 94-101. <https://doi.org/10.25082/TCPP.2021.01.006>
- 643 48. Bayih WA, Birhane BM, Belay DM, et al. The state of birth asphyxia in Ethiopia: An umbrella  
644 review of systematic review and meta-analysis reports, 2020. *Heliyon*. 2021;7(10):e08128.
- 645 49. Mulatu T, Debella A, Feto T, Dessie Y. Determinants of stillbirth among women who gave birth at  
646 Hiwot Fana Specialized University Hospital, Eastern Ethiopia: A facility-based cross-sectional study.  
647 *SAGE Open Medicine*. 2022;10:2.
- 648 50. Cheong-See, F, Schuit, E, Arroyo-Manzano, D, et al. Prospective risk of stillbirth and neonatal  
649 complications in twin pregnancies: systematic review and meta-analysis. *BMJ* 2016; 354: i4353.
- 650 51. Cheong-See F, Schuit E, Arroyo-Manzano D, Khalil A, Barrett J, Joseph KS, Asztalos E, Hack K, Lewi  
651 L, Lim A, Liem S. Prospective risk of stillbirth and neonatal complications in twin pregnancies:  
652 systematic review and meta-analysis. *Bmj*. 2016;354.
- 653 52. Habte A, Wondimu M. Determinants of maternal near miss among women admitted to  
654 maternity wards of tertiary hospitals in Southern Ethiopia, 2020: A hospital-based case-control  
655 study. *PloS one*, 2021. 16(5): p. e0251826. <https://doi.org/10.1371/journal.pone.0251826> PMID:  
656 33999941
- 657 53. Habte A, Lukas K, Melis T, Tamene A, Sahle T, Hailu M, et al. Determinants of neonatal near miss  
658 among neonates admitted to public hospitals in Southern Ethiopia, 2021: A case-control study. *PLoS*  
659 *ONE*. 2022;17(5): e0268041. <https://doi.org/10.1371/journal.pone.0268041>
- 660 54. World Health Organization. WHO Recommendations on Antenatal Care for a Positive Pregnancy  
661 Experience  
662 [[https://apps.who.int/iris/bitstream/handle/10665/250796/9789241549912eng.pdf;jsessionid=FC8](https://apps.who.int/iris/bitstream/handle/10665/250796/9789241549912eng.pdf;jsessionid=FC8B1A05DB47E824E012407A5C1EB4A8?sequence=1)  
663 [B1A05DB47E824E012407A5C1EB4A8?sequence=1](https://apps.who.int/iris/bitstream/handle/10665/250796/9789241549912eng.pdf;jsessionid=FC8B1A05DB47E824E012407A5C1EB4A8?sequence=1). Accessed 5 August 2021]



664

665 55. Desai D, Maitra N, Patel P. Fetal heart rate patterns in patients with thick meconium staining of  
666 amniotic fluid and its association with perinatal outcome. *Int J Reprod Contracept Obstet Gynecol*.  
667 2017;6(3):1030–5

668 56. Alam MM, Saleem AF, Shaikh AS, Munir O, Qadir M. Neonatal sepsis following prolonged rupture  
669 of membranes in a tertiary care hospital in Karachi, Pakistan. *The Journal of Infection in Developing*  
670 *Countries*. 2014;8(01):067-73.

671 57. Assefa, N., Berhe, H., Girma, F. et al. Risk factors of premature rupture of membranes in public  
672 hospitals at Mekele city, Tigray, a case control study. *BMC Pregnancy Childbirth*. 2018;18, 386.  
673 <https://doi.org/10.1186/s12884-018-2016-6>

674 58. Chaibva, et al. Adverse pregnancy outcomes, ‘stillbirths and early neonatal deaths’ in Mutare  
675 district, Zimbabwe. *BMC Pregnancy Childbirth*. 2019;19:86 [https://doi.org/10.1186/s12884-019-](https://doi.org/10.1186/s12884-019-2229-3)  
676 [2229-3](https://doi.org/10.1186/s12884-019-2229-3)

677 59. Olusanya BO, Ofovwe GE. Predictors of preterm births and low birthweight in an inner-city  
678 hospital in sub-Saharan Africa. *Matern Child Health J*. 2010;14:978–986. pmid:19795198
